# Supplementary material
Source: PubMed Central journal article supplement (PMC3957606)
Supplement: AEM.03633-13_zam999105172so1.pdf [file AEM.03633-13_zam999105172so1.pdf]

1 **Supplemental Material for**

2 Active ammonia oxidizers in an acid soil are phylogenetically closely related to  
3 neutrophilic archaeon

4 Baozhan Wang<sup>1§</sup>, Yan Zheng<sup>1§</sup>, Rong Huang<sup>1</sup>, Xue Zhou<sup>1</sup>, Dongmei Wang<sup>1</sup>,  
5 Yuanqiu He<sup>1</sup>, Zhongjun Jia<sup>1\*</sup>

6 \*Correspondence should be addressed to Zhongjun Jia at

7 State Key Laboratory of Soil and Sustainable Agriculture  
8 Institute of Soil Science, Chinese Academy of Sciences  
9 Nanjing, 210008, Jiangsu Province, P.R. China  
10 E-mail: [jia@issas.ac.cn](mailto:jia@issas.ac.cn)  
11 Tel: +86-25-8688-1311, Fax: +86-25-8688-1000

12 §These authors have contributed equally to this work

13 **This file includes:**

14 **Supplemental Table S1**

15 **Supplemental Table S2**

16 **Supplemental Table S3**

17 **Supplemental Figure S1**

18 Table S1. Pyrosequencing summary of the total 16S rRNA genes in the fractionated DNA from SIP microcosms after incubation for 56 days

| DNA fractions | High Quality Read Number*     |                               |                                                              | Proportion of nitrifier-like 16S rRNA genes to the total 16S rRNA gene reads in each DNA fractions, % |                               |                                                              |                               |                               |                                                              |                               |                               |                                                              |
|---------------|-------------------------------|-------------------------------|--------------------------------------------------------------|-------------------------------------------------------------------------------------------------------|-------------------------------|--------------------------------------------------------------|-------------------------------|-------------------------------|--------------------------------------------------------------|-------------------------------|-------------------------------|--------------------------------------------------------------|
|               |                               |                               |                                                              | AOA†                                                                                                  |                               |                                                              | AOB†                          |                               |                                                              | NOB†                          |                               |                                                              |
|               | <sup>13</sup> CO <sub>2</sub> | <sup>12</sup> CO <sub>2</sub> | <sup>13</sup> CO <sub>2</sub> +C <sub>2</sub> H <sub>2</sub> | <sup>13</sup> CO <sub>2</sub>                                                                         | <sup>12</sup> CO <sub>2</sub> | <sup>13</sup> CO <sub>2</sub> +C <sub>2</sub> H <sub>2</sub> | <sup>13</sup> CO <sub>2</sub> | <sup>12</sup> CO <sub>2</sub> | <sup>13</sup> CO <sub>2</sub> +C <sub>2</sub> H <sub>2</sub> | <sup>13</sup> CO <sub>2</sub> | <sup>12</sup> CO <sub>2</sub> | <sup>13</sup> CO <sub>2</sub> +C <sub>2</sub> H <sub>2</sub> |
| 14            | 648                           | 2176                          | 2722                                                         | 0.80±0.22 <sup>b</sup>                                                                                | 15.35±4.97 <sup>a</sup>       | 0.51±0.25 <sup>b</sup>                                       | - <sup>a</sup>                | 0.08±0.14 <sup>a</sup>        | 0.02±0.03 <sup>a</sup>                                       | 1.69±1.59 <sup>a</sup>        | 0.85±0.21 <sup>a</sup>        | 0.64±0.45 <sup>a</sup>                                       |
| 13            | 3130                          | 6072                          | 1939                                                         | 3.04±0.97 <sup>b</sup>                                                                                | 11.93±1.08 <sup>a</sup>       | 0.06±1.03 <sup>c</sup>                                       | - <sup>a</sup>                | 0.02±0.02 <sup>a</sup>        | 0.01±0.01 <sup>a</sup>                                       | 0.79±0.57 <sup>a</sup>        | 0.48±0.15 <sup>a</sup>        | 0.36±0.33 <sup>a</sup>                                       |
| 12            | 5254                          | 8043                          | 3768                                                         | 2.73±1.85 <sup>b</sup>                                                                                | 13.53±0.39 <sup>a</sup>       | 0.54±0.94 <sup>b</sup>                                       | 0.04±0.05 <sup>b</sup>        | 0.28±0.11 <sup>a</sup>        | 0.05±0.03 <sup>b</sup>                                       | 0.99±0.45 <sup>b</sup>        | 2.48±0.22 <sup>a</sup>        | 0.54±0.51 <sup>b</sup>                                       |
| 11            | 7348                          | 7879                          | 6538                                                         | 0.87±0.35 <sup>b</sup>                                                                                | 3.54±1.37 <sup>a</sup>        | 0.22±0.38 <sup>b</sup>                                       | 0.04±0.02 <sup>a</sup>        | 0.16±0.10 <sup>a</sup>        | 0.02±0.02 <sup>b</sup>                                       | 1.75±0.34 <sup>b</sup>        | 7.82±1.62 <sup>a</sup>        | 1.21±0.11 <sup>b</sup>                                       |
| 10            | 7417                          | 7801                          | 8046                                                         | 0.11±0.08 <sup>a</sup>                                                                                | 0.19±0.03 <sup>a</sup>        | ---                                                          | 0.03±0.01 <sup>a</sup>        | 0.01±0.02 <sup>a</sup>        | 0.01±0.02 <sup>a</sup>                                       | 0.95±0.17 <sup>b</sup>        | 2.44±0.27 <sup>a</sup>        | 0.39±0.09 <sup>c</sup>                                       |
| 9             | 8947                          | 8059                          | 7320                                                         | 0.05±0.04 <sup>a</sup>                                                                                | 0.22±0.03 <sup>a</sup>        | ---                                                          | 0.01±0.01 <sup>a</sup>        | 0.01±0.01 <sup>a</sup>        | ---                                                          | 0.75±0.18 <sup>a</sup>        | 1.11±0.17 <sup>a</sup>        | 0.15±0.06 <sup>b</sup>                                       |
| 8             | 8205                          | 7112                          | 7554                                                         | 0.17±0.10 <sup>a</sup>                                                                                | 0.31±0.04 <sup>a</sup>        | 0.01±0.02 <sup>b</sup>                                       | 0.01±0.01 <sup>a</sup>        | 0.01±0.01 <sup>a</sup>        | ---                                                          | 6.07±1.00 <sup>a</sup>        | 0.89±0.21 <sup>b</sup>        | 0.20±0.09 <sup>c</sup>                                       |
| 7             | 5366                          | 3790                          | 3158                                                         | 3.15±0.59 <sup>a</sup>                                                                                | 0.78±0.26 <sup>b</sup>        | 0.10±0.17 <sup>c</sup>                                       | 0.48±0.58 <sup>a</sup>        | 0.03±0.03 <sup>a</sup>        | 0.02±0.03 <sup>a</sup>                                       | 17.60±1.37 <sup>a</sup>       | 1.20±0.30 <sup>b</sup>        | 0.48±0.06 <sup>c</sup>                                       |
| 6             | 4243                          | 11884                         | 8919                                                         | 22.64±3.28 <sup>a</sup>                                                                               | 1.06±0.71 <sup>b</sup>        | ---                                                          | 1.63±0.36 <sup>a</sup>        | 0.03±0.02 <sup>b</sup>        | 0.01±0.01 <sup>b</sup>                                       | 35.31±7.17 <sup>a</sup>       | 0.85±0.28 <sup>b</sup>        | 0.51±0.45 <sup>b</sup>                                       |
| 5             | 6802                          | 8149                          | 14735                                                        | 10.08±1.69 <sup>a</sup>                                                                               | 1.51±1.17 <sup>b</sup>        | 0.11±0.20 <sup>b</sup>                                       | 0.48±0.25 <sup>a</sup>        | 0.02±0.02 <sup>b</sup>        | 0.08±0.11 <sup>b</sup>                                       | 24.76±3.98 <sup>a</sup>       | 0.75±0.26 <sup>b</sup>        | 0.49±0.20 <sup>b</sup>                                       |
| 4             | 2309                          | 7575                          | 11944                                                        | 1.05±0.99 <sup>a</sup>                                                                                | 0.82±0.21 <sup>a</sup>        | 0.22±0.38 <sup>a</sup>                                       | 0.12±0.15 <sup>a</sup>        | 0.09±0.12 <sup>a</sup>        | 0.03±0.04 <sup>a</sup>                                       | 3.23±3.81 <sup>a</sup>        | 0.73±0.20 <sup>a</sup>        | 0.60±0.06 <sup>a</sup>                                       |
| 3             | 1530                          | 3398                          | 8542                                                         | 1.22±0.66 <sup>a</sup>                                                                                | 1.23±0.36 <sup>a</sup>        | 0.15±0.26 <sup>b</sup>                                       | 0.07±0.09 <sup>a</sup>        | 0.08±0.06 <sup>a</sup>        | 0.03±0.03 <sup>a</sup>                                       | 1.65±0.58 <sup>a</sup>        | 0.86±0.03 <sup>b</sup>        | 0.52±0.31 <sup>b</sup>                                       |
| Total reads   | 684,972                       |                               |                                                              |                                                                                                       |                               |                                                              |                               |                               |                                                              |                               |                               |                                                              |

19 \* denotes the mean of biological triplicate of 16S rRNA gene pyrosequencing was used.

20 --- denotes the sequence was not detectable.

21 † The same letter indicates no significant difference ( $P > 0.05$ ) using analysis of variance.

22

23 Table S2. Phylogenetic classification of <sup>13</sup>C-labeled 16S rRNA genes of nitrifying communities

| Microbe | Taxonomy                    | Reads Numbers in <sup>13</sup> C-DNA * |
|---------|-----------------------------|----------------------------------------|
| AOA     | <i>Nitrososphaera</i>       | 1815 (100%)                            |
|         | <i>Nitrosopumilis</i>       | 0                                      |
|         | <i>Nitrosotalea</i>         | 0                                      |
|         | <i>Nitrosocaldus</i>        | 0                                      |
| AOB     | <i>Nitrospira</i> cluster 3 | 127 (100%)                             |
|         | <i>Nitrosomonas</i>         | 0                                      |
| NOB     | <i>Nitrospira</i>           | 4109 (99.6%)                           |
|         | <i>Nitrobacter</i>          | 17 (0.4%)                              |

24 \* denotes the 16S rRNA gene reads of each phylotype that were pooled from heavy DNA-fraction-5,  
 25 6 and 7 from labelled treatments. The number of 16S rRNA gene reads is followed by the values in  
 26 bracket representing sequence proportion of each phylotype to the total AOA, AOB or NOB 16S  
 27 rRNA genes.

28 Table S3. The putative contribution of AOA and AOB to the nitrification activity in the acidic soil tested.

| Treatment*                    | Microbes                | Copy number of genes in total DNA (g <sup>-1</sup> d.w.s)† | Ratio of gene copy number in heavy DNA fractions to total gene copy number across the entire DNA fractions‡ | Copy number of genes in 'heavy' DNA fractions (g <sup>-1</sup> d.w.s) | Number of labeled cells (g <sup>-1</sup> d.w.s)§ | NO <sub>3</sub> <sup>-</sup> -N after 56-day incubation (µg g <sup>-1</sup> d.w.s) | Putative cell-specific ammonia oxidation rate (fmol cell <sup>-1</sup> h <sup>-1</sup> ) |
|-------------------------------|-------------------------|------------------------------------------------------------|-------------------------------------------------------------------------------------------------------------|-----------------------------------------------------------------------|--------------------------------------------------|------------------------------------------------------------------------------------|------------------------------------------------------------------------------------------|
| <sup>13</sup> CO <sub>2</sub> | AOA ( <i>amoA</i> gene) | 3.12×10 <sup>8</sup>                                       | 84.6%                                                                                                       | 2.64×10 <sup>8</sup>                                                  | 2.64×10 <sup>8</sup>                             | 178.2                                                                              | 0.036<br>(0.058)                                                                         |
|                               | AOB ( <i>amoA</i> gene) | 3.20×10 <sup>7</sup>                                       | 2.10%                                                                                                       | 6.72×10 <sup>5</sup>                                                  | 2.69×10 <sup>5</sup>                             |                                                                                    | 35.2<br>(5.3~7.1)                                                                        |

29 \* represents the labeled treatments incubated with <sup>13</sup>CO<sub>2</sub> in the absence of acetylene with three true replicates.

30 † represents the copy numbers of archaeal or bacterial *amoA* genes in the total DNA in g<sup>-1</sup> d.w.s.

31 ‡ represents the ratio of archaeal or bacterial *amoA* gene copy numbers in the heavy DNA fraction-5, 6 and 7 to the sum of archaeal or bacterial *amoA* gene copies in all DNA gradient fractions.

33 § represents cell numbers of <sup>13</sup>C-labeled AOA and AOB assuming each AOB and AOA cell contains 2.5 and 1.0 of *amoA* gene copy respectively.

34 || represents the putative cell-specific ammonia oxidation rate of AOA or AOB, and it was calculated by dividing the production rate of soil nitrate by the <sup>13</sup>C-labeled AOA or AOB cell numbers in the <sup>13</sup>C-labeled DNA fractions from the labelled treatment spanning 8-week incubation, assuming the soil nitrate production resulted solely from either <sup>13</sup>C-labeled AOA or AOB. The number in bracket of 0.058 represents the cell-specific rate of ammonia oxidation of strain JG1 (1), and the numbers of 5.3 and 7.1 represent the cell-specific rates of ammonia oxidation of strains L115 and AF (2), respectively.

38 **Supplementary Figure S1.** Phylogenetic relationship of the 16S rRNA genes of AOB  
 39 in the <sup>13</sup>C-DNA from the labeled microcosms after incubation for 56 days. The 16S  
 40 rRNA reads of AOB in the ‘heavy’ DNA fraction-5, 6 and 7 were pooled for analysis  
 41 with a total number of 127. The designation 454-AOB-HF-OTU-1-118-(93%) indicates  
 42 that OTU-1 contains 118 sequences with >97% identity, accounting for 93% of the total  
 43 16S rRNA sequences of AOB in the <sup>13</sup>C-DNA. The scale bar represents nucleotide acid  
 44 substitution percentage.

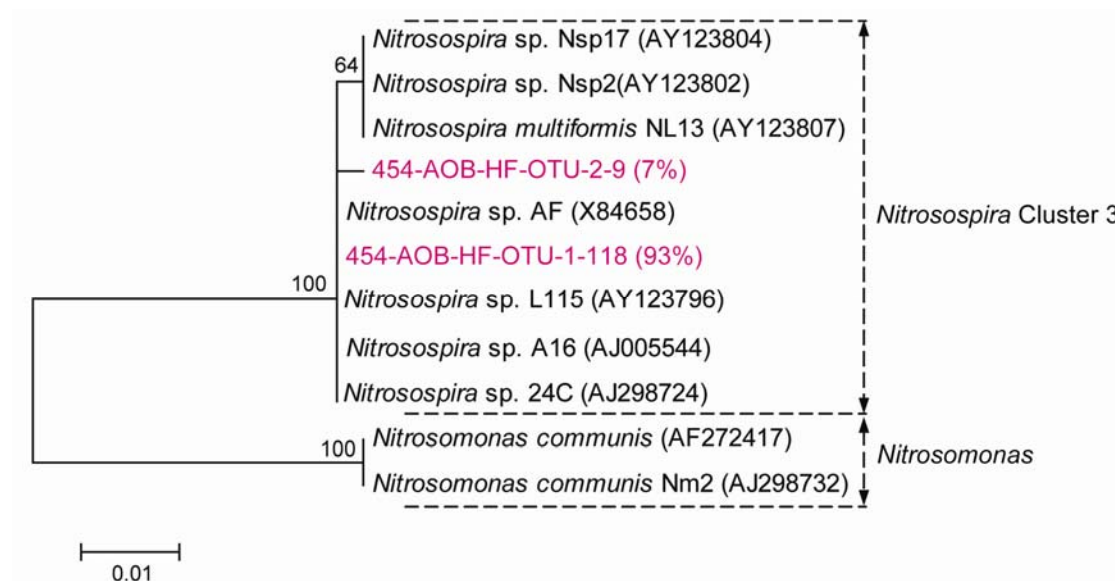

46 **Reference**

- 47 1. **Kim JG, Jung MY, Park SJ, Rijpstra WIC, Sinninghe Damsté JS, Madsen EL, Min D, Kim**  
 48 **JS, Kim GJ, Rhee SK.** 2012. Cultivation of a highly enriched ammonia-oxidizing archaeon of  
 49 thaumarchaeotal group I.1b from an agricultural soil. *Environ. Microbiol.* **14**:1528-1543.  
 50 2. **Jiang QQ, Bakken LR.** 1999. Comparison of Nitrosospira strains isolated from terrestrial  
 51 environments. *FEMS Microbiol. Ecol.* **30**:171-186.
